# Supplementary material for: A speed–fidelity trade-off determines the mutation rate and virulence of an RNA virus
Source: PubMed Central journal article supplement (PMC6040757; doi:10.1371/journal.pbio.2006459), 2018-06-28
Supplement: pbio.2006459.s003.pdf [file pbio.2006459.s003.pdf]

Figure S1

**A**

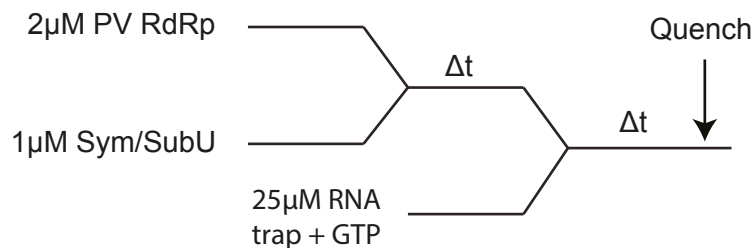

**B**

| GMP misincorporation |                              |                         |
|----------------------|------------------------------|-------------------------|
| Enzyme               | $k_{pol}$ ( $s^{-1}$ )       | $K_{d,app}$ ( $\mu M$ ) |
| WT                   | $1.5 \pm 0.1 \times 10^{-2}$ | $250 \pm 10$            |
| K276R                | $5.0 \pm 0.1 \times 10^{-3}$ | $250 \pm 80$            |
| G64S-K276R           | $2.0 \pm 0.1 \times 10^{-3}$ | $300 \pm 50$            |
| G64S                 | $4.0 \pm 0.1 \times 10^{-3}$ | $300 \pm 40$            |

S1 Figure. In vitro assay of polymerase mediated single nucleotide incorporation. (A) Schematic of GTP misincorporation assay (G opposite the U). Primer-template (sym-subU) and polymerase are assembled in the absence of nucleotide. GTP and a 25-fold excess of unlabeled trap RNA are then added after an incubation period ( $\Delta t$ ). Excess of RNA trap ensures that if the polymerase dissociates from primer-template it is taken up by the trap and cannot re-assemble. (B)  $k_{pol}$  and  $K_d$  for GMP misincorporation. Concentrations of GTP were used over time-points to calculate  $k_{pol}$  and  $K_d$ . Each GTP time-course was plotted to single exponential, then combined plot to hyperbola. Note that all polymerase variants have the I92T mutation.
