# Supplementary material for: A speed–fidelity trade-off determines the mutation rate and virulence of an RNA virus
Source: PubMed Central journal article supplement (PMC6040757; doi:10.1371/journal.pbio.2006459), 2018-06-28
Supplement: pbio.2006459.s004.pdf [file pbio.2006459.s004.pdf]

Figure S2

**A**

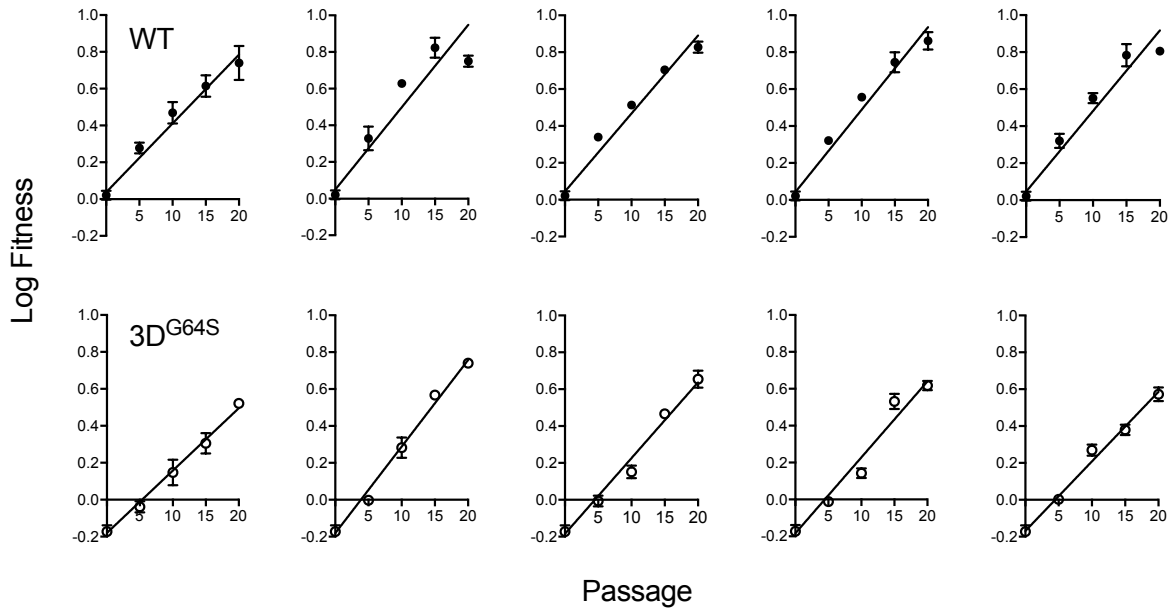

**B**

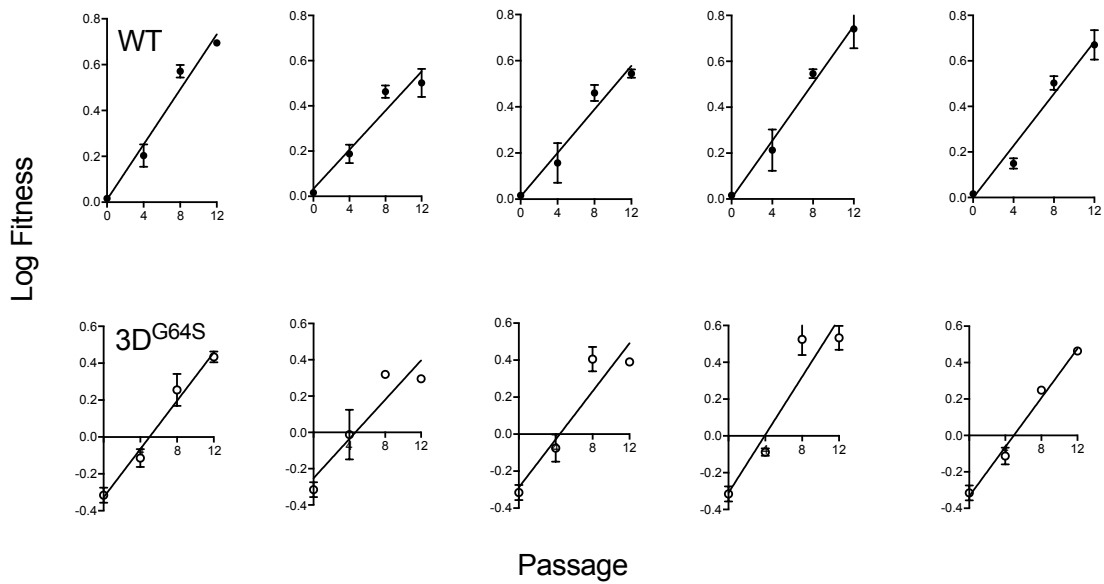

S2 Figure. Log<sub>10</sub> fitness versus passage in adaptability experiment. Each point is the fitness mean  $\pm$  standard deviation of three replicate competition assays. (A) WT and 3DG64S on HeLa (B) WT and 3DG64S on PVR-3T3. For the graphs in (B), the relationship of log fitness vs. passage was not linear past passage 16, and only passages 1-12 are shown. All plotted data can be found in SI, S1 Data.
